# Supplementary material
Source: PubMed Central journal article supplement (PMC3993059)
Supplement: Supp_Fig1.pdf [file Supp_Fig1.pdf]

## Supplementary Data

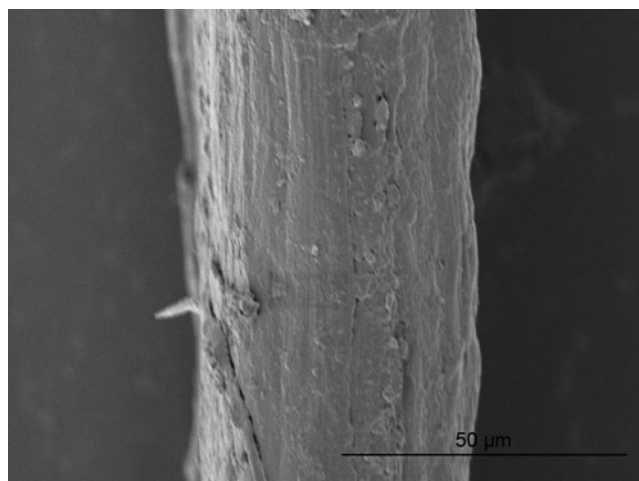

**SUPPLEMENTARY FIG. S1.** SEM image of the microstructure of a linear ordered collagen scaffold (LOCS) fiber.
