# Supplementary material
Source: PubMed Central journal article supplement (PMC3993059)
Supplement: Supp_Fig2.pdf [file Supp_Fig2.pdf]

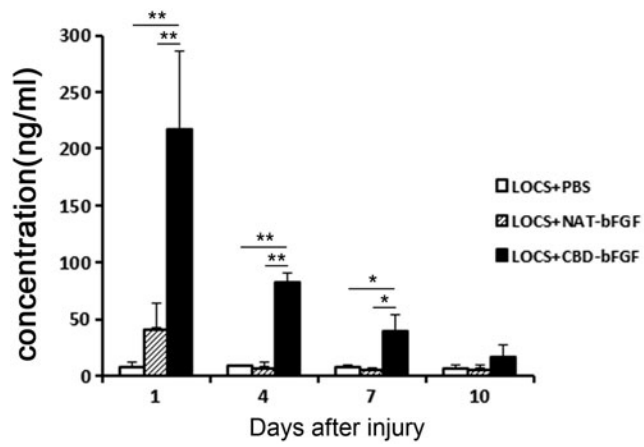

**SUPPLEMENTARY FIG. S2.** Basic fibroblast growth factor (bFGF) levels at the injured site of the sciatic nerve were determined at 1, 4, 7, and 10 days after implantation by ELISA. The data are expressed as mean  $\pm$  SD,  $n=3$ , \* $p < 0.05$ , \*\* $p < 0.01$ .
